# Supplementary material
Source: Springer Nature journal article supplement (https://www.springermedizin.de/resource/supplementary/12963_2006_50_MOESM3_ESM.pdf/9572530)

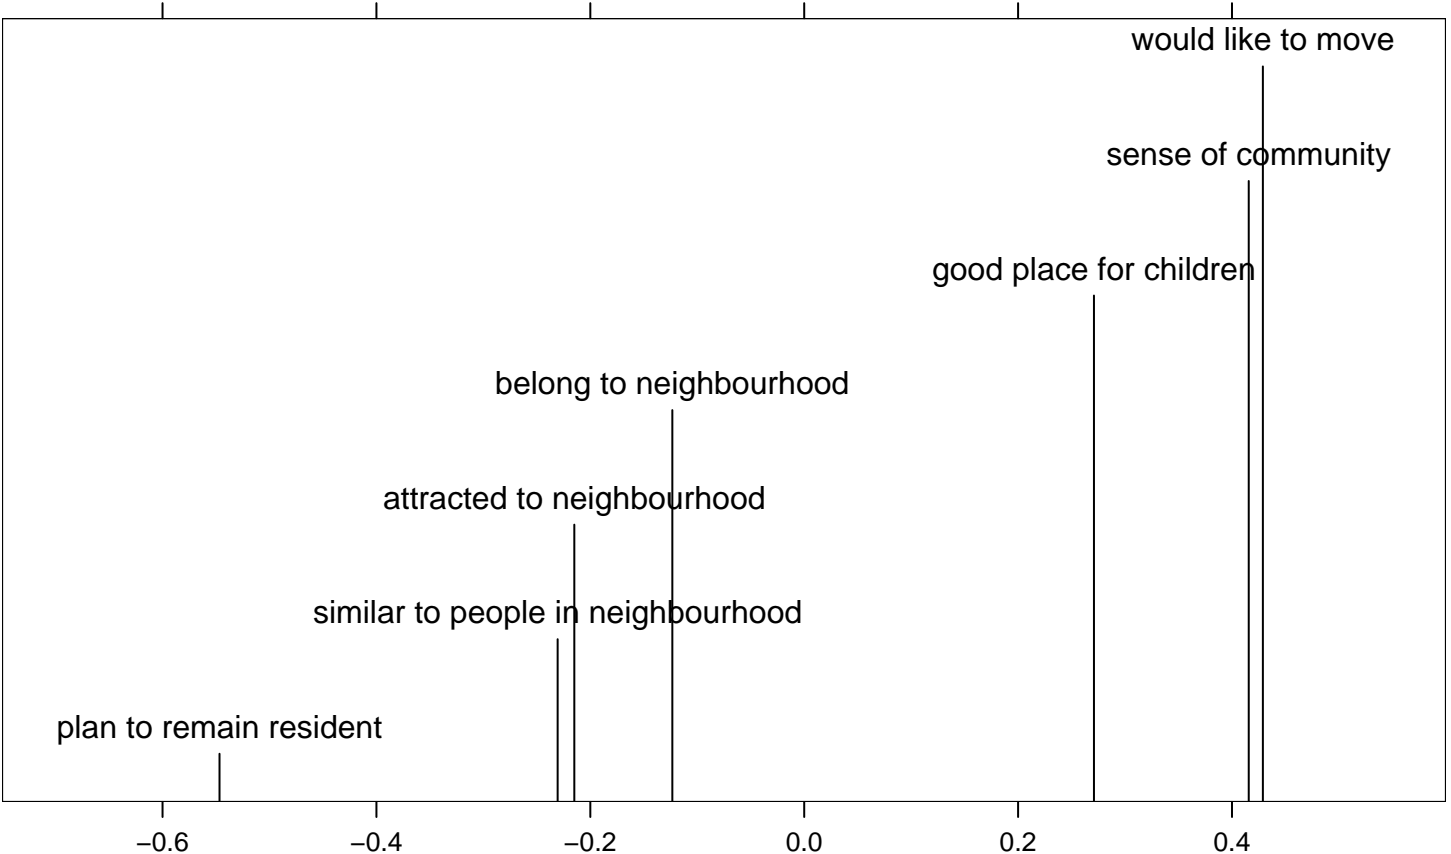

Supplement: MOESM3 [file 9572530]
